# Supplementary material for: Continuous microfluidic synthesis of colloidal ultrasmall gold nanoparticles:in situstudy of the early reaction stages and application for catalysis
Source: Royal Society of Chemistry journal article supplement (doi:10.1039/c7re00114b), 2017-01-01
Supplement: c7re00114b1.pdf [file c7re00114b1.pdf]

## Supporting Information

### Continuous Microfluidic Synthesis of Colloidal Ultrasmall Gold Nanoparticles: In situ Investigation of the Early Reaction Stages and Application for Catalysis

Ghazal Tofight<sup>a</sup>, Henning Lichtenberg<sup>a,b</sup>, Jan Pesek<sup>a</sup>, Thomas L. Sheppard<sup>a,b</sup>, Wu Wang<sup>c</sup>, Ludger Schöttner<sup>d</sup>, Günter Rinke<sup>e</sup>, Roland Dittmeyer<sup>e</sup>, and Jan-Dierk Grunwaldt<sup>a,b,\*</sup>

<sup>a</sup> Institute for Chemical Technology and Polymer Chemistry (ITCP), Karlsruhe Institute of Technology (KIT), D-76131 Karlsruhe, Germany

<sup>b</sup> Institute of Catalysis Research and Technology (IKFT), Karlsruhe Institute of Technology (KIT), D-76344 Eggenstein-Leopoldshafen, Germany

<sup>c</sup> Institute of Nanotechnology (INT), Karlsruhe Institute of Technology (KIT), D-76344 Eggenstein-Leopoldshafen, Germany

<sup>d</sup> Institute of Functional Interfaces (IFG), Karlsruhe Institute of Technology (KIT), D-76344 Eggenstein-Leopoldshafen, Germany

<sup>e</sup> Institute for Micro Process Engineering (IMVT), Karlsruhe Institute of Technology (KIT), D-76344 Eggenstein-Leopoldshafen, Germany

\* Corresponding author: grunwaldt@kit.edu

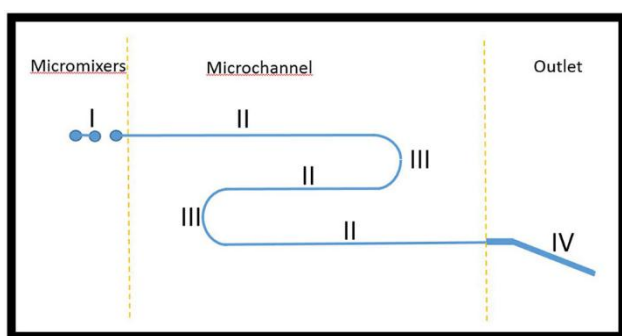

**Fig. S1** Schematic of the microfluidic chip.

**Table S1** Pressure drop of the reactant flow inside the microfluidic chip at different positions (cf. Fig. S1) estimated with water as the medium, 20°C temperature, 2.6 L h<sup>-1</sup> flow rate and 13 bar pressure.

| Zone                | Description                  | Dimensions (mm) |     |     | Pressure drop (bar) |
|---------------------|------------------------------|-----------------|-----|-----|---------------------|
|                     |                              | W               | H   | L   |                     |
| I                   | Micromixers with connections | -               | -   | -   | 4.1 <sup>a</sup>    |
| II                  | Rectangular tubes            | 0.3             | 0.3 | 138 | 7.5 <sup>b</sup>    |
| III                 | U-turns                      | 0.3             | 0.3 | 7   | 0.8 <sup>b</sup>    |
| IV                  | Rectangular tubes            | 1               | 1   | 12  | 0                   |
| Total pressure drop |                              |                 |     |     | 12.4                |

<sup>a</sup>) obtained from CFD calculations conducted at IMVT-KIT, <sup>b</sup>) calculated using the program “Druckverlust Online-Rechner”, <http://www.druckverlust.de/Online-Rechner/>

**Table S2** Fluid mechanical conditions inside the microfluidic chip.

| Parameters                | Values                                             |
|---------------------------|----------------------------------------------------|
| Medium                    | Water                                              |
| Density                   | 998.2 kg m <sup>-3</sup>                           |
| Dynamic viscosity (20 °C) | 1.00 mPas                                          |
| Flow rate                 | 2.6 L h <sup>-1</sup>                              |
| Flow velocity             | 8.04 m s <sup>-1</sup>                             |
| Reynolds number           | 2400                                               |
| Flow type                 | Transitional region from laminar to turbulent flow |
| Pressure drop             | 12.4 bar                                           |

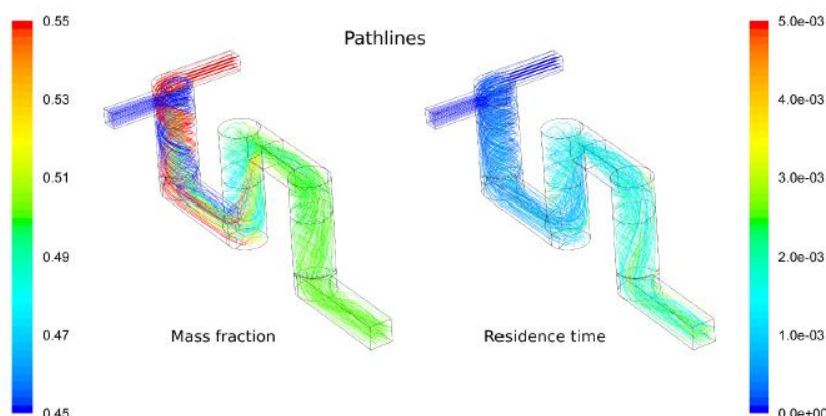

**Fig. S2** CFD calculations for the three cyclone micromixers; (left) mass fraction and (right) residence time in seconds for total flow rate of 2.0 L h<sup>-1</sup>. The cyclone diameters are 500, 700 and 700  $\mu\text{m}$  with 1500  $\mu\text{m}$  height. The connecting channel dimension is 300  $\mu\text{m}$  in 300  $\mu\text{m}$ . (Reproduced from [Hofmann, G.H., Development of Methods and Devices for Spatially and Temporally Resolved X-Ray Microscopy for Characterization in Heterogeneous Catalysis, Dissertation, Karlsruhe Institute of Technology, Karlsruhe, Germany (2015), <http://dx.doi.org/10.5445/IR/1000049565>] with permission of G. Hofmann, Published under Creative Commons Attribution 3.0 DE License.)

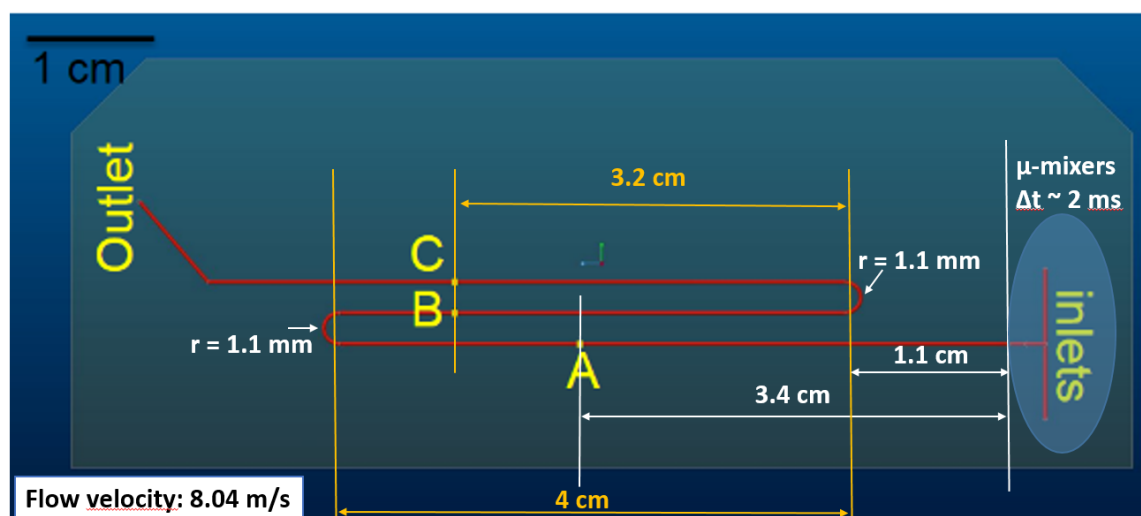

**Fig. S3** Spatial-temporal points in the microchannel selected for XAS measurements (Positions A, B and C with corresponding reaction times of 6 ms, 10 ms and 18 ms.).

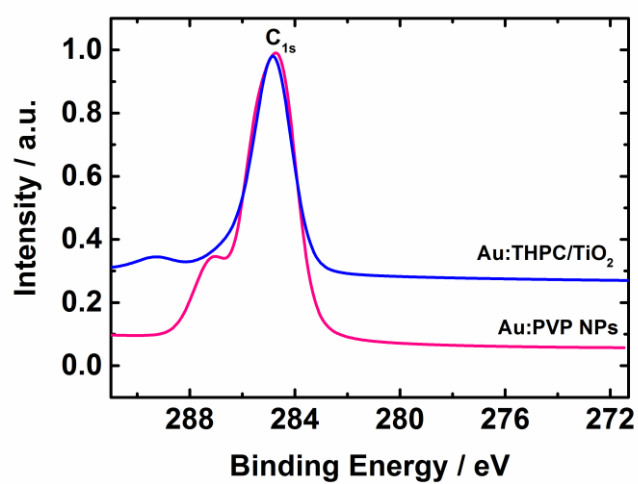

**Fig. S4** XPS spectra of the C 1s level of Au:PVP NPs synthesized in microfluidic reactor and Au:THPC NPs synthesized in batch reactor and supported on titania.
